# Supplementary material for: Candidate SNP markers of aggressiveness-related complications and comorbidities of genetic diseases are predicted by a significant change in the affinity of TATA-binding protein for human gene promoters
Source: PubMed Central journal article supplement (PMC5249025; doi:10.1186/s12864-016-3353-3), 2016-12-28
Supplement: 12864_2016_3353_MOESM1_ESM.pdf [file 12864_2016_3353_MOESM1_ESM.pdf]

## Additional file 1: Supplementary Method.

### A quantitative sequence-based prediction of the TATA-binding protein (TBP) binding affinity for the human gene promoter

The initializing data are the 90-bp DNA sequence  $\{s_{-90} \dots s_i \dots s_{-1}\}$  immediately upstream of the transcription start site (TSS,  $s_0$ ) (where  $s_i \in \{a, c, g, t\}$ ).

We used the linear approximation of the three-step molecular mechanism of TBP's binding to the  $[-70; -20]$  region of the eukaryotic gene promoters—e.g.: (i) TBP slides along DNA  $\leftrightarrow$  (ii) TBP stops at a potential TBP-binding site  $\leftrightarrow$  the DNA helix bends to the  $90^\circ$  angle and stabilizes the local TBP-promoter complex—as follows:

$$-\ln(K_D) = 10.9 - 0.2 \{ \ln(K_{SLIDE}) + \ln(K_{STOP}) + \ln(K_{BEND}) \}, \quad (1)$$

where 10.9 (ln units) is nonspecific TBP-DNA affinity ( $10^{-5}$  M), 0.2 is the stoichiometric coefficient, and  $K_{STOP}$  is our heuristic estimate of the equilibrium constant of the second step of the TBP stops at a TBP-binding site (the maximal score value of Bucher's position-weight matrix, the commonly accepted criterion of the canonical form of a TBP-binding site [146]);  $K_{SLIDE}$  is our heuristic estimate of the equilibrium constant of the first step of the TBP sliding along DNA; we estimated its value empirically as

$$-\ln(K_{SLIDE}) = \text{MEAN}_{15\text{bp}} \{ 0.8[\text{TA}]_{3'\text{HALF}} - 3.4\text{MGW}_{\text{CENTER}} - 35.1 \},$$

where  $[\text{TA}]_{3'\text{HALF}}$  is the frequency of dinucleotide TA within the 3' half of the sequence being analyzed;  $\text{MGW}_{\text{CENTER}}$  is the arithmetical mean width of the minor groove of the DNA helix [147]; 0.8,  $-3.4$ , and  $-35.1$  are linear regression coefficients taken from our original experimental data [148].

In Eq. (1),  $K_{BEND}$  is our heuristic estimate of the equilibrium constant at the third step of DNA helix bending; we estimated its value empirically as

$$-\ln(K_{BEND}) = \text{MEAN}_{\text{TATA-box}} \{ 0.9[\text{TA}, \text{AA}, \text{TG}, \text{AG}]_{\text{FLANK}} + 2.5[\text{TA}, \text{TC}, \text{TG}]_{\text{CENTER}} + 14.4 \},$$

where 0.9, 2.5, and 14.4 are linear regression coefficients calculated from our original experimental data [149];  $\text{MEAN}_{\text{TATA-box}}$  is the arithmetic mean value for both DNA strands of the TBP-binding site at the position of the maximal score value of Bucher's position-weight matrix [146].

Using all the 78 possible nucleotide substitutions,  $s_{i+j} \rightarrow \xi$ , at each  $j$ -th position ( $-13 \leq j \leq 12$ ;  $3 \times 26$ ) within the 26-bp DNA window centered by  $i$ -th position of the promoter DNA under study, we estimated heuristically the standard deviation of the  $-\ln[K_D]$  estimates (Eq. 1), namely:

$$\delta = [(\sum_{1 \leq i \leq 26} \sum_{\xi \in \{a,c,g,t\}} [\ln(K_D(\{s_{i-13} \dots s_{i+j-1} \xi s_{i+j+1} \dots s_{i+12}\}) / K_D(\{s_{i-13} \dots s_{i+j-1} s_{i+j+1} \dots s_{i+12}\}))^2] / 78)]^{1/2}. \quad (2)$$

Thus, the preliminary result of the DNA sequence analysis is the maximal value of  $-\ln(K_D) \pm \delta$  among all the possible estimates of TBP's binding affinity for the DNA fragment of 26-bp in length,  $\{s_{i-13} \dots s_i \dots s_{i+12}\}$  at the  $i$ -th position in-between  $-70$  and  $-20$  for both DNA chains (where  $K_D$  is the equilibrium dissociation constant expressed in moles per liter; M).

Applying Eqs. (1–2) to the cases of two mutator and ancestral alleles of a given gene,  $(-\ln(K_D^{(\text{mut})}) \pm \delta_{(\text{mut})})$  and  $(-\ln(K_D^{(\text{wt})}) \pm \delta_{(\text{wt})})$ , we calculated Fisher's Z-score such as

$$Z = \text{abs}[\ln(K_D^{(\text{mut})} / K_D^{(\text{wt})})] / [\delta_{(\text{mut})}^2 + \delta_{(\text{wt})}^2]^{1/2}.$$

The statistical package R [150] transformed this Z-score value into the p value of the probability rate of acceptance of the hypothesis “ $H_0: -\ln(K_D^{(\text{mut})}) \neq -\ln(K_D^{(\text{wt})})$ ” (where  $\alpha = 1 - p$  is the statistical significance level). At this statistically significant level  $\alpha < 0.05$  (i.e., at  $p > 0.95$ ), we made the final decision:

**IF** {INEQUALITY “ $-\ln(K_D^{(\text{mut})}) > -\ln(K_D^{(\text{wt})})$ ” is statistically significant},

**THEN** {DECISION is “there is excessive expression of the mutator allele of a given gene versus the ancestral allele”};

**ELSE** [IF {INEQUALITY “ $-\ln(K_D^{(\text{mut})}) < -\ln(K_D^{(\text{wt})})$ ” is statistically significant},

**THEN** {DECISION is “there is lower expression of the mutator allele of this gene versus the ancestral allele”},]

**OTHERWISE** {DECISION is “alteration of the expression of this gene is insignificant”}.
